# Supplementary material
Source: Springer Nature journal article supplement (https://www.springermedizin.de/resource/supplementary/12879_2008_858_MOESM3_ESM.pdf/9449938)

A

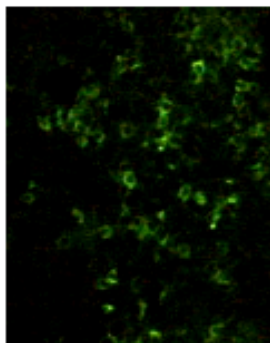

B

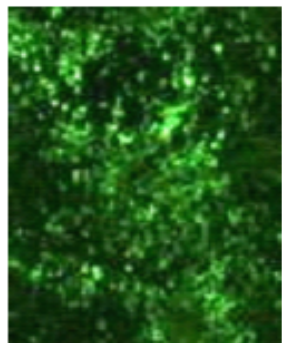

C

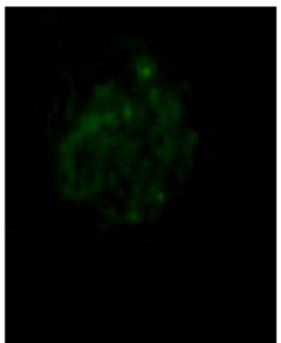

D

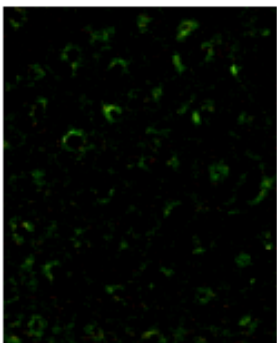

E

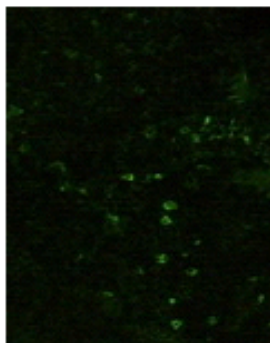

F

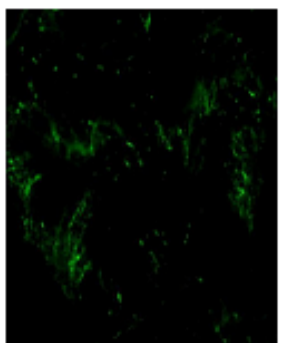

G

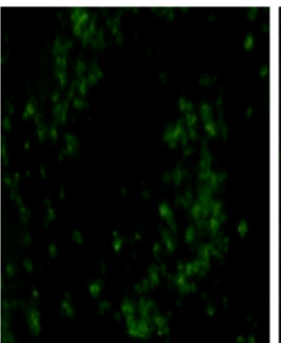

H

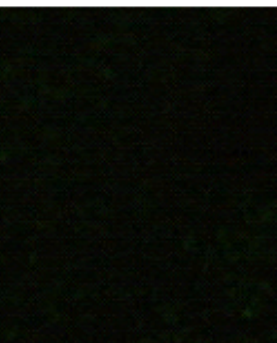

Supplement: MOESM3 [file 9449938]
